# Supplementary material for: Nano-engineering of liposomes using a supercritical CO2mediated gas anti-solvent method
Source: Royal Society of Chemistry journal article supplement (doi:10.1039/c6ra09530e), 2016-01-01
Supplement: c6ra09530e1.pdf [file c6ra09530e1.pdf]

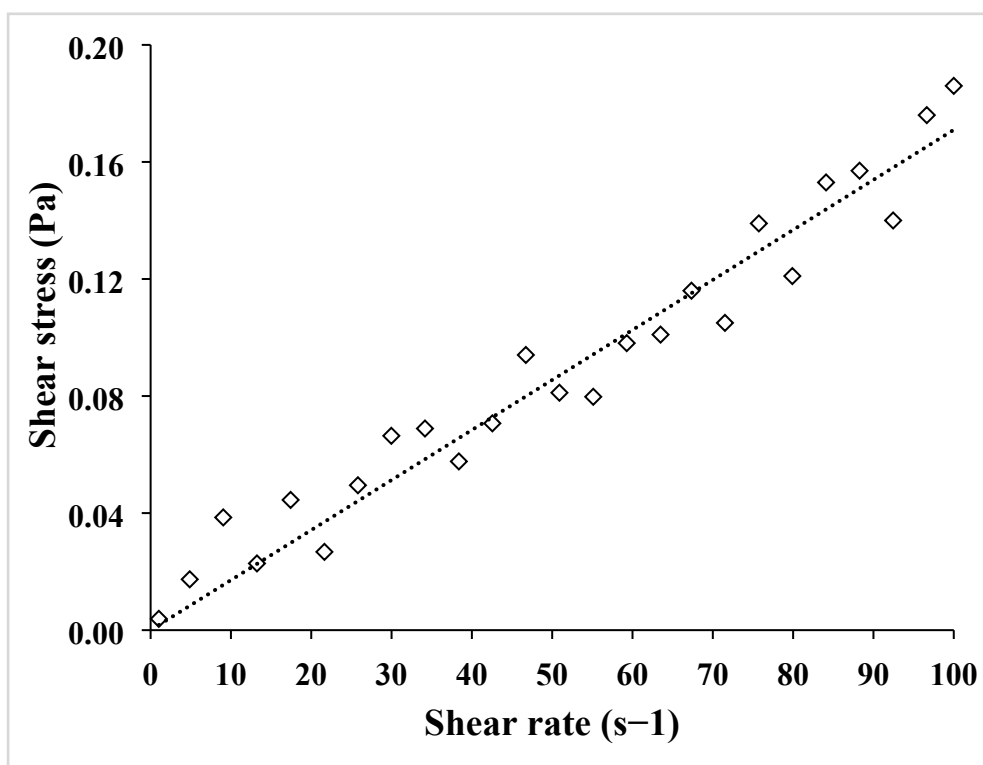

**Fig. S1.** Flow behavior of Liposome prepared at 170 bar, 50 °C and 1.5% Tween 80.

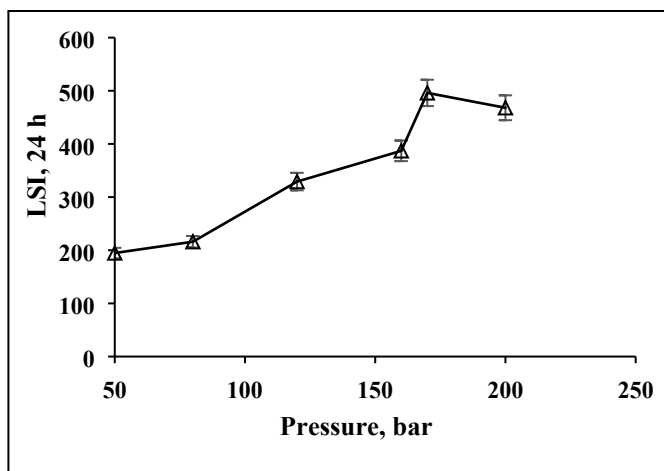

(A)

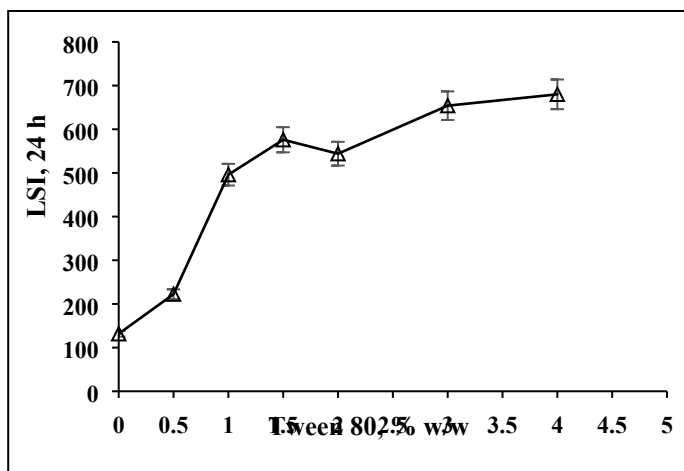

(B)

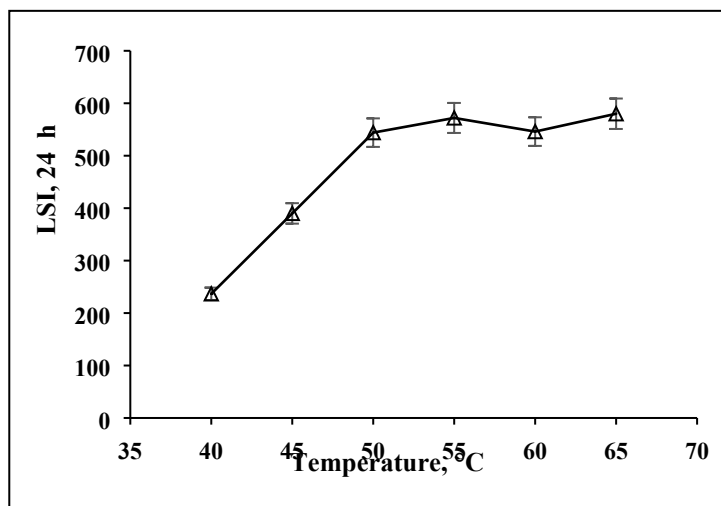

(C)

**Fig. S2.** Liposome stability index, a) Effect of pressure; b) Effect of surfactant (Tween 80) concentration; c) Effect of temperature.
